# Supplementary material
Source: HighWire-hosted journal article supplement (http://jneurosci.org/highwire/filestream/600379/field_highwire_adjunct_files/3/fig_4.pdf)

# Characteristic path length $\lambda$ - IQ, $T = 0.45$

## Full scale IQ

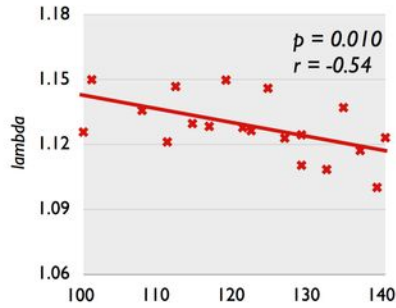

## VIQ

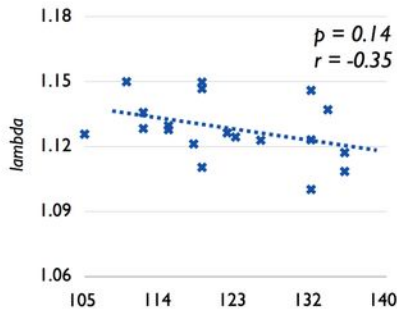

## PIQ

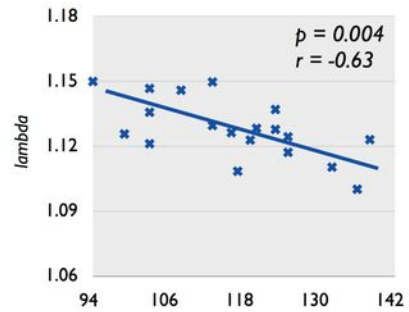

## VCI

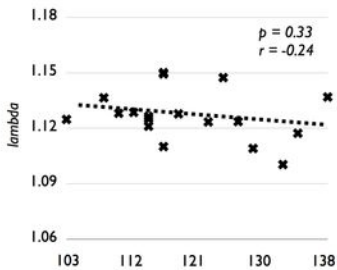

## WMI

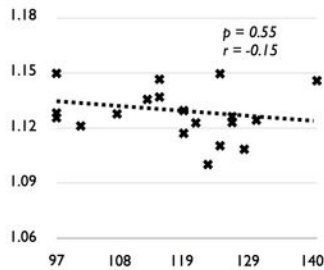

## POI

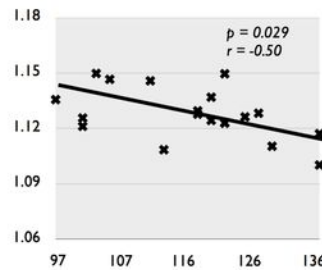

## PSI

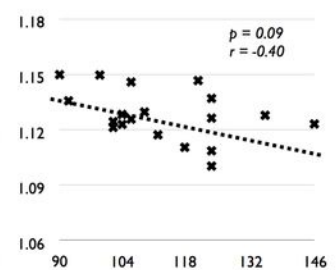

Supplement: fig_4.pdf [file fig_4.pdf]
